# Supplementary material for: SARS-CoV-2 Receptor Angiotensin I-Converting Enzyme Type 2 (ACE2) Is Expressed in Human Pancreatic β-Cells and in the Human Pancreas Microvasculature
Source: PubMed Central journal article supplement (PMC7691425; doi:10.3389/fendo.2020.596898), 2020-11-13

# Sequence Coverage Map ACE2 in EndoC-βH1 (Exp1)

Minimum MS Signal = 40000  
 Protease = Trypsin

| Proteins     | Number of MS Peaks | MS Peak Area | Sequence Coverage | Abundance (mol) |
|--------------|--------------------|--------------|-------------------|-----------------|
| 1:ACE2       | 61                 | 0.3%         | 39.1%             | 100.00%         |
| Unidentified | 54507              | 99.7%        |                   |                 |

MS Signal Threshold = 5.4e+004

## ACE2

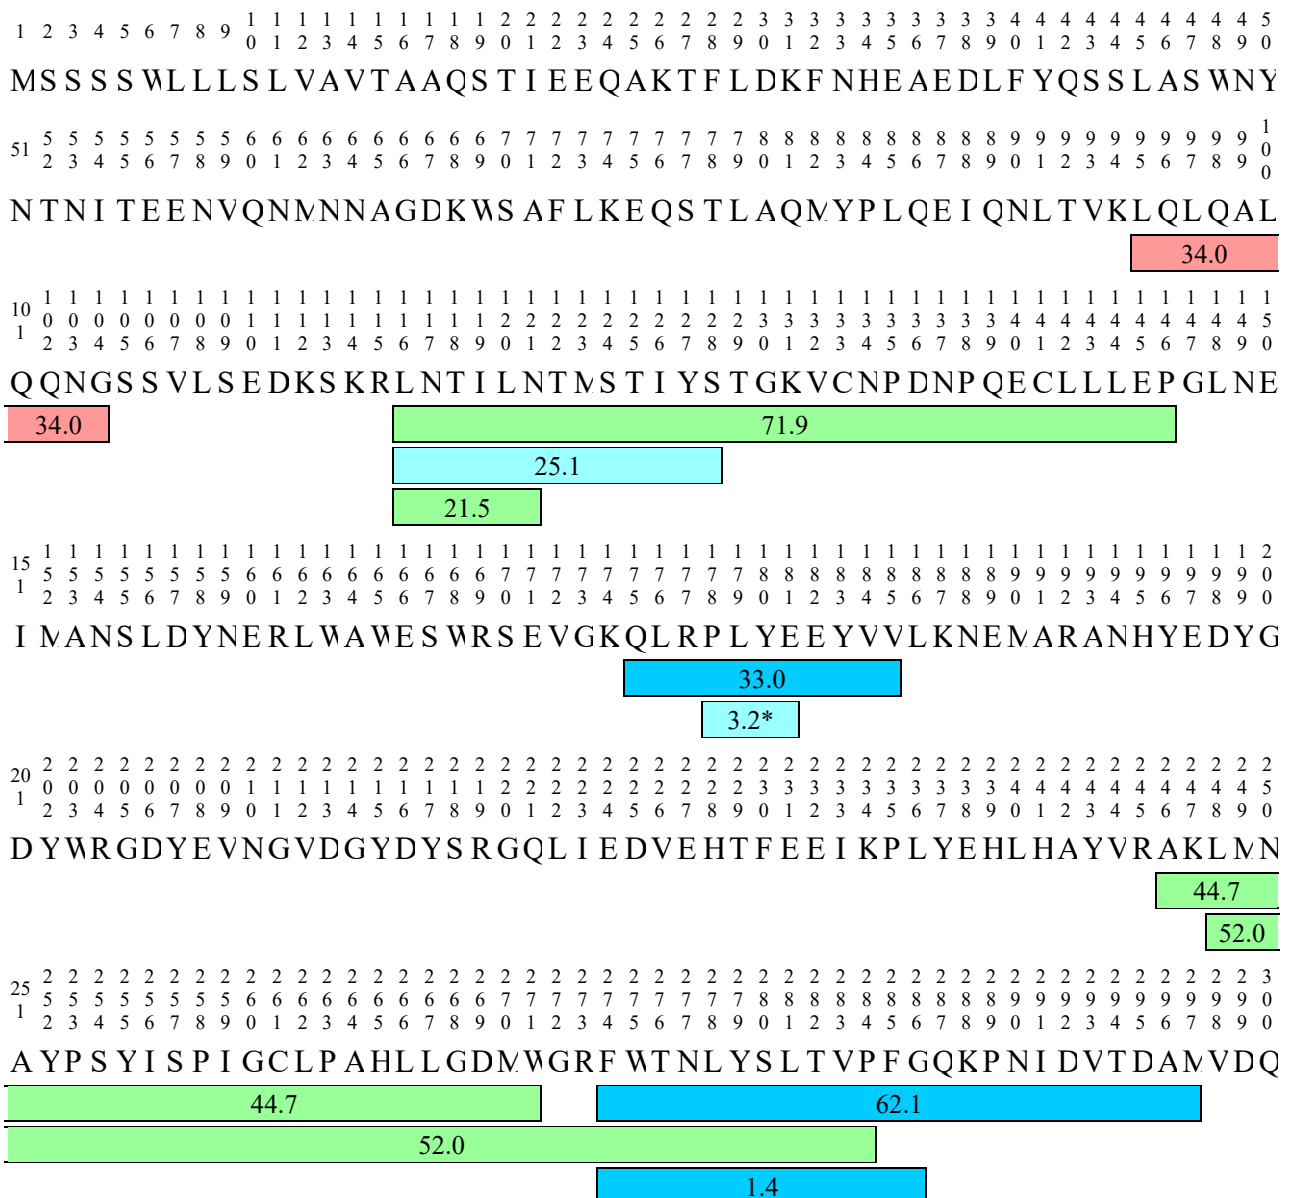





# Sequence Coverage Map ACE2 in EndoC-βH1 (Exp2)

Minimum MS Signal = 20000  
 Protease = Trypsin

| Proteins     | Number of MS Peaks | MS Peak Area | Sequence Coverage | Abundance (mol) |
|--------------|--------------------|--------------|-------------------|-----------------|
| 1:ACE2       | 88                 | 0.3%         | 36.1%             | 100.00%         |
| Unidentified | 43608              | 99.7%        |                   |                 |

MS Signal Threshold = 3.3e+004

## ACE2

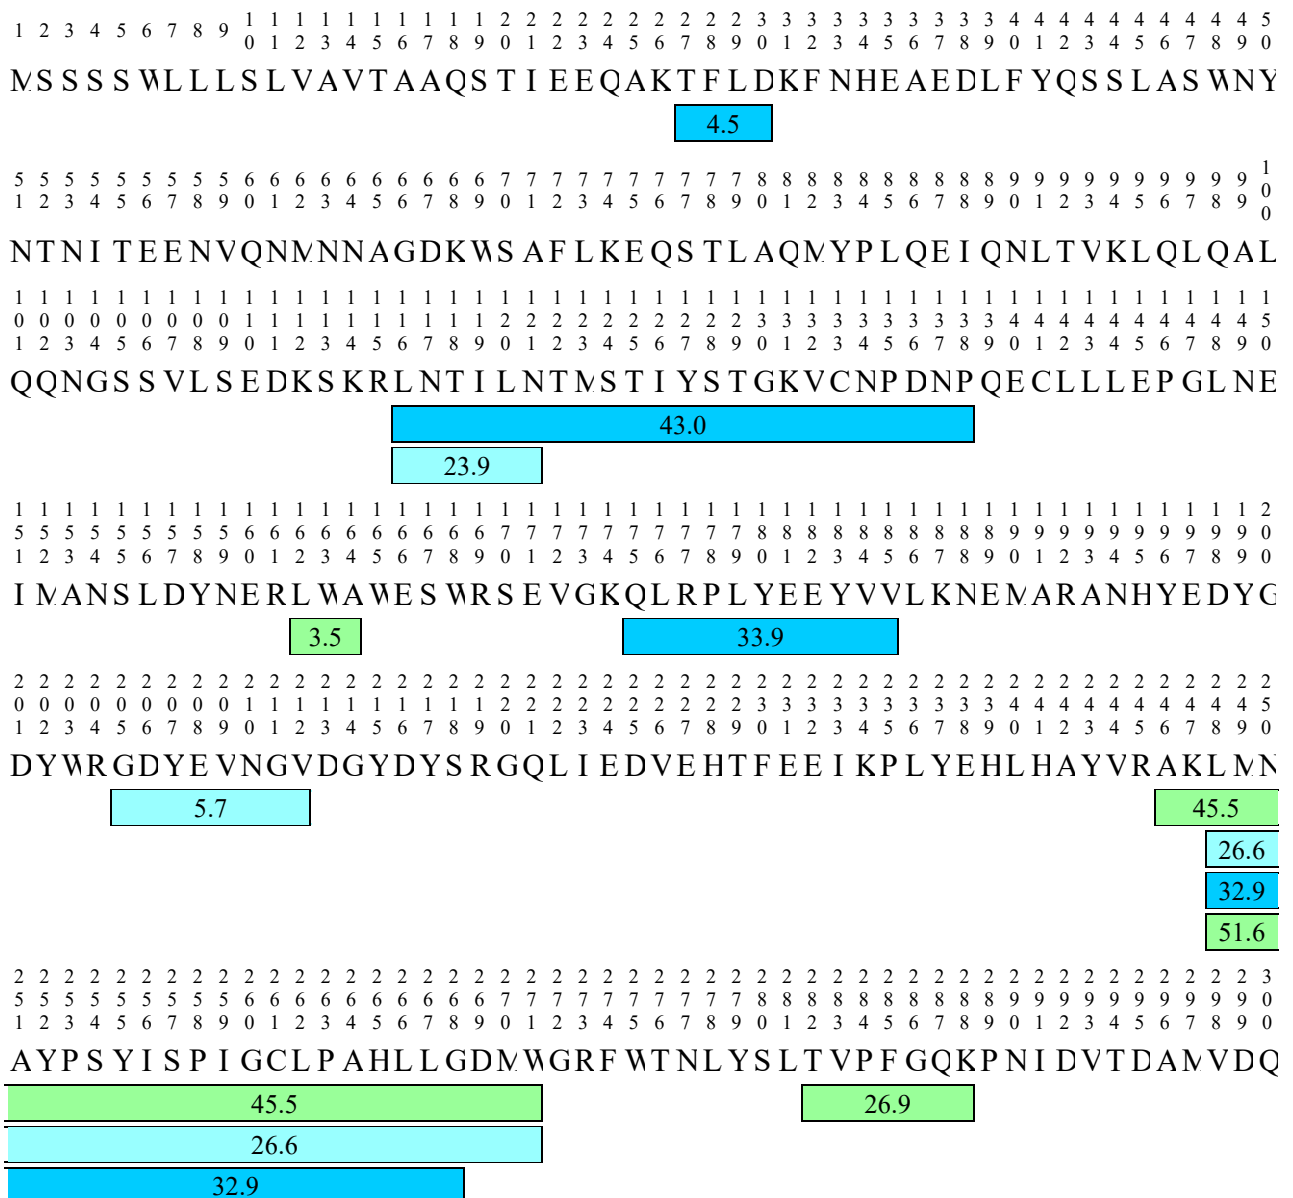

Supplement: DataSheet_2.pdf [file DataSheet_2.pdf]
